# Supplementary material for: Extensin arabinoside chain length is modulated in elongating cotton fibre
Source: PubMed Central journal article supplement — Cell Surf. 2019 Oct 25;5:100033. doi: 10.1016/j.tcsw.2019.100033 (PMC7388976; doi:10.1016/j.tcsw.2019.100033), 2019-10-25
Supplement: mmc1.pdf [file mmc1.pdf]

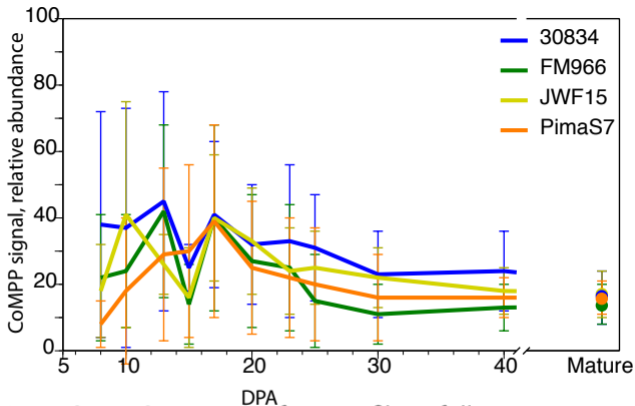

Figure S1. NaOH extract of cotton fibres following sequential CDTA extraction (see Figure 1) probed with anti-extensin mAb JIM20. Error bars represent standard deviation of three biological replicates.
